# Supplementary material for: Organic dyes for the sensitization of nanostructured ZnO photoanodes: effect of the anchoring functions
Source: Royal Society of Chemistry journal article supplement (doi:10.1039/c5ra11762c), 2015-01-01
Supplement: c5ra11762c1.pdf [file c5ra11762c1.pdf]

## Organic dyes for the sensitization of ZnO nanostructured photoanodes: effect of the anchoring functions

Jesús Idígoras,<sup>a\*</sup> Maxime Godfroy,<sup>b,c,d</sup> Damien Joly,<sup>b,c,d</sup> Anna Todinova,<sup>a</sup> Pascale Maldivi,<sup>e,f</sup> Gerko Oskam,<sup>g</sup> Renaud Demadrille,<sup>b,c,d</sup> and Juan A. Anta,<sup>a</sup>

<sup>a</sup> Área de Química Física, Departamento de Sistemas Físicos, Químicos y Naturales, Universidad Pablo de Olavide, E-41013, Seville, Spain.

<sup>b</sup> Univ. Grenoble Alpes, INAC-SPRAM, F-38000 Grenoble, France

<sup>c</sup> CNRS, INAC-SPRAM, F-38000 Grenoble, France

<sup>d</sup> CEA, INAC-SPRAM, F-38000 Grenoble, France

<sup>e</sup> Univ. Grenoble Alpes, INAC-SCIB, F-38000 Grenoble, France.

<sup>f</sup> CEA, INAC-SCIB, F-38000 Grenoble, France.

<sup>g</sup> Departamento de Física Aplicada, CINVESTAV-IPN, 97310, Mérida, Yucatán, México.

| Molecule (trans) | thio | btdz  | ph    | C=C   | CN   | COOH | PO <sub>3</sub> H <sub>2</sub> |
|------------------|------|-------|-------|-------|------|------|--------------------------------|
| 6ORK1            | 6.5  | 40.86 | 11.26 | 18.09 | 2.27 | 4.51 | -                              |
| MG100            | 7.95 | 43.08 | 16.97 | 17.95 | 3.42 | -    | 0                              |
| MG41             | 3.86 | 23.29 | 18.77 | 28.35 | 4.80 | 2.21 | -                              |

**Table S1:** Contribution of the various groups to the LUMO (%). Thio = thiophene, btdz = benzothiadiazole, ph = phenyl (bearing the cyanoacrylic group). % are calculated from coefficients  $\geq 1\%$ . Total is not = 100% (between 83-90%).

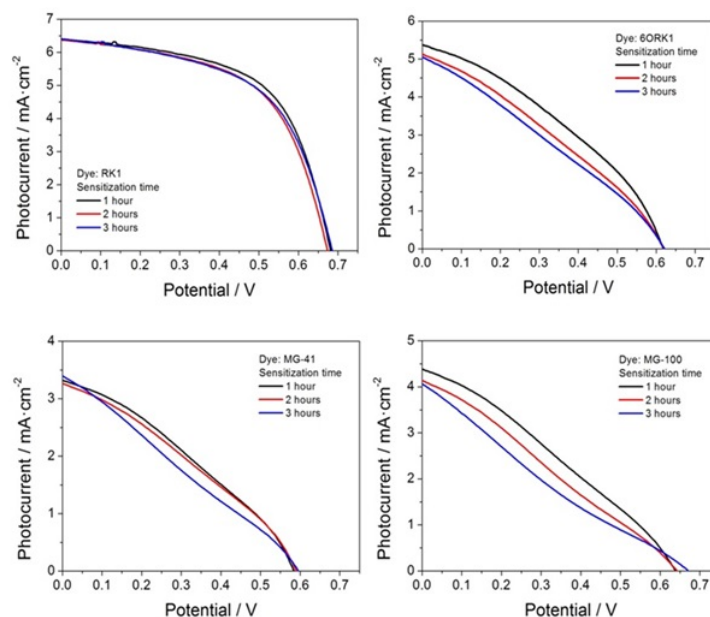

**Figure S1:** Current-voltage characteristics under 1-sun AM1.5 illumination for all the organic dyes using different sensitization times.

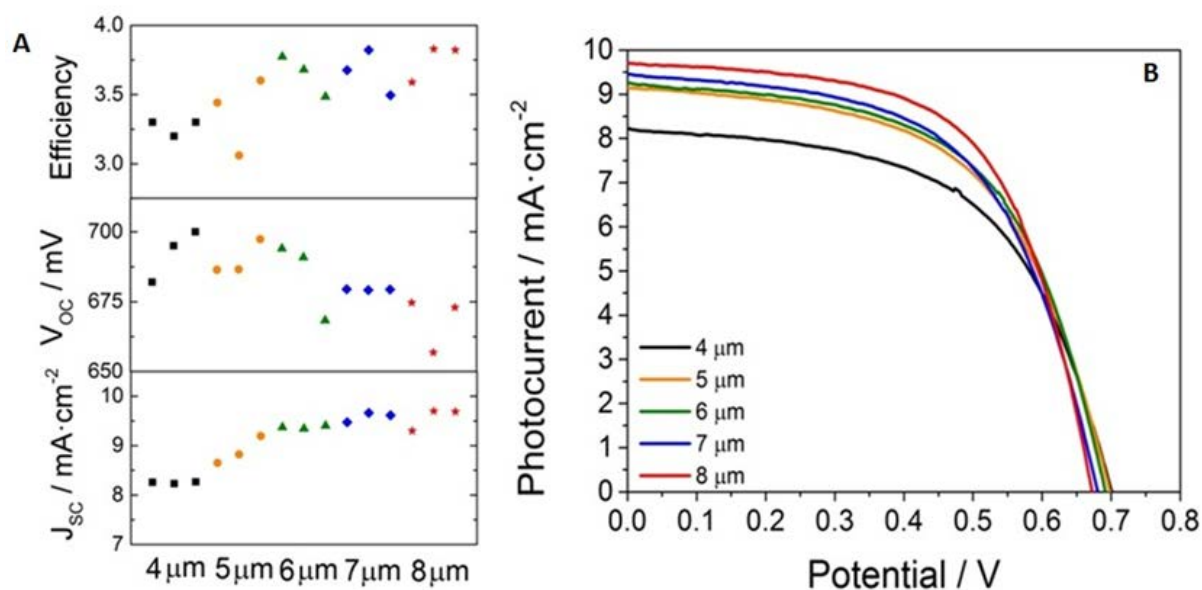

**Figure S2:** (A) Photovoltaic parameter (efficiency, open-circuit photovoltage and short-circuit photocurrent) for RK1-DSSCs using different thickness of photoanode. 3 samples have been measured. (B) Current-voltage for the best cell of each configuration. All DSSCs were characterized under 1-sun AM 1.5 illumination.

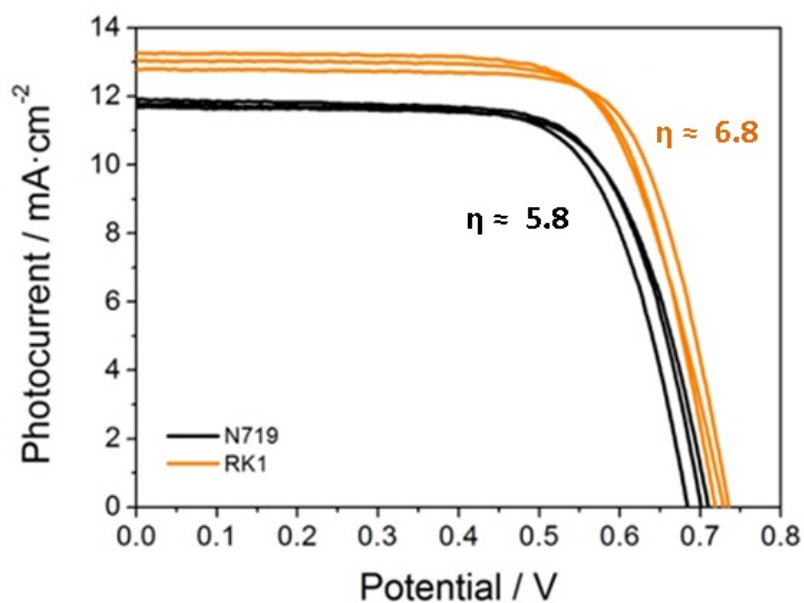

**Figure S3:** Current-voltage curves under 1 sun AM 1.5 illumination for RK1 and N719 using a 12  $\mu\text{m}$   $\text{TiO}_2$  film as photoanode.

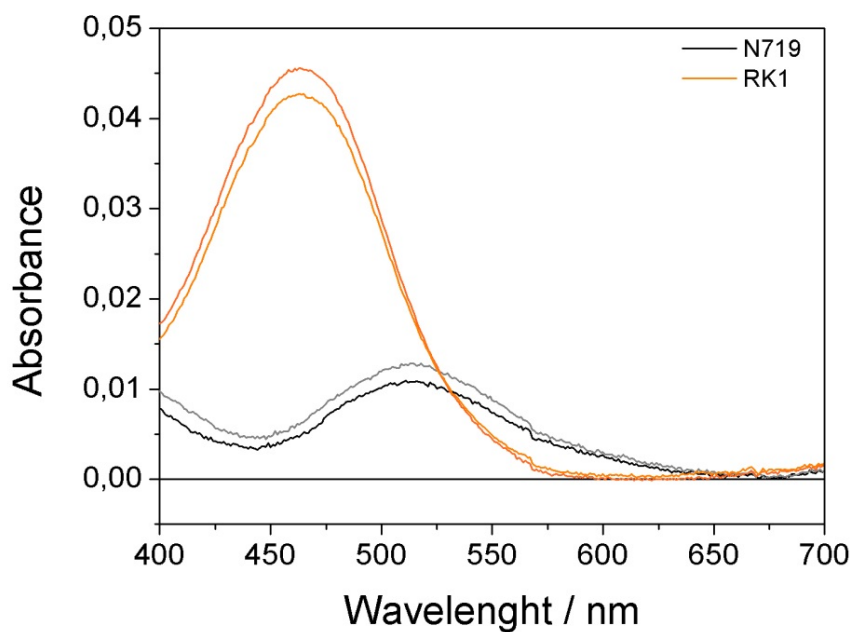

**Figure S4:** Absorbance spectra of solution (0.1M KOH in methanol) containing the desorbed dye. From these spectra, the following dye loadings have been calculated:  $4.6 \cdot 10^{-8}$  moles/cm<sup>2</sup> and  $2.7 \cdot 10^{-8}$  moles/cm<sup>2</sup> for RK1- and N719-photoanodes respectively.

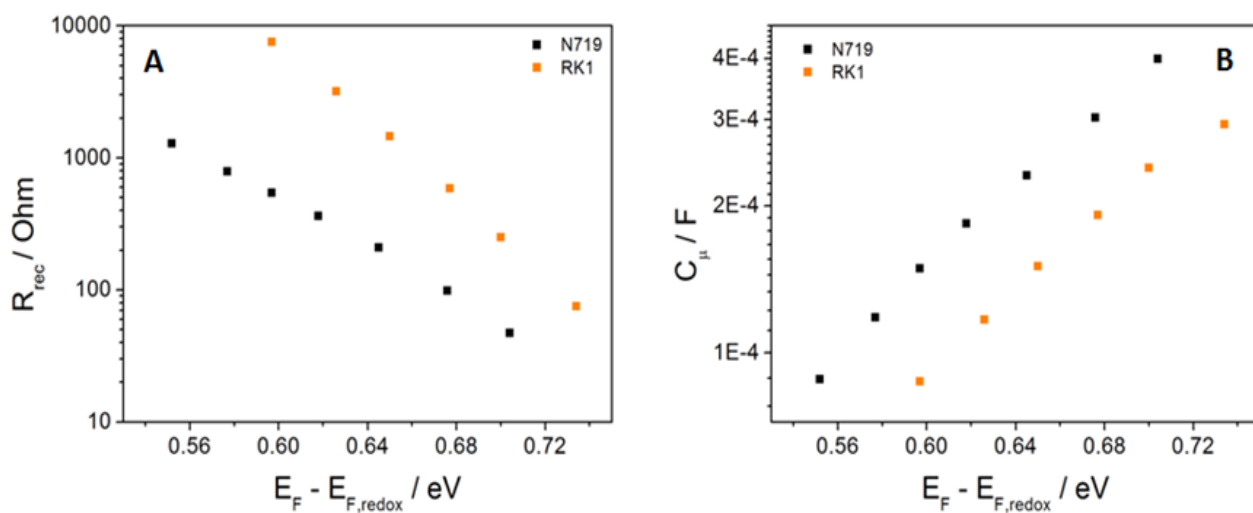

**Figure 5:** (A) Electron recombination resistance and (B) chemical capacitance data as extracted from EIS measurements in TiO<sub>2</sub>-DSSC with RK1 and N719 as sensitizers.

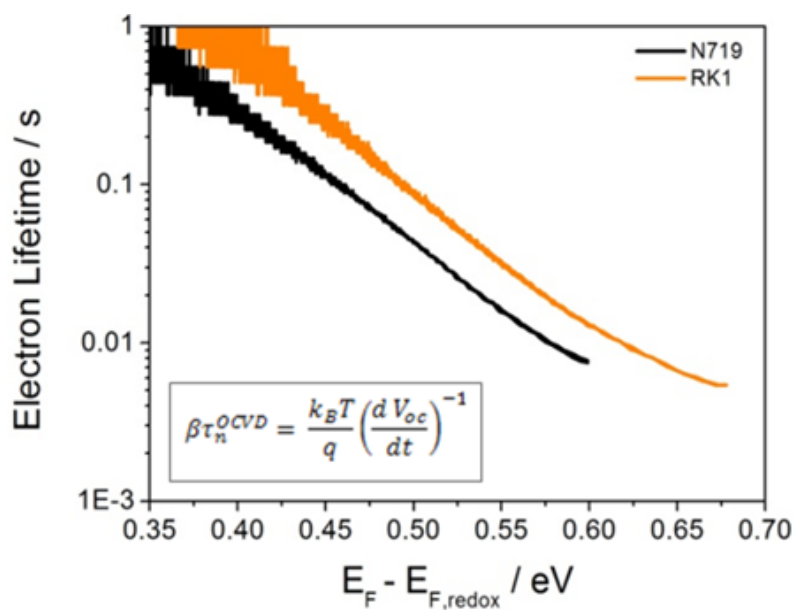

**Figure S6:** Electron lifetime as extracted from OCVD for N719-DSSC and RK1-DSSC.

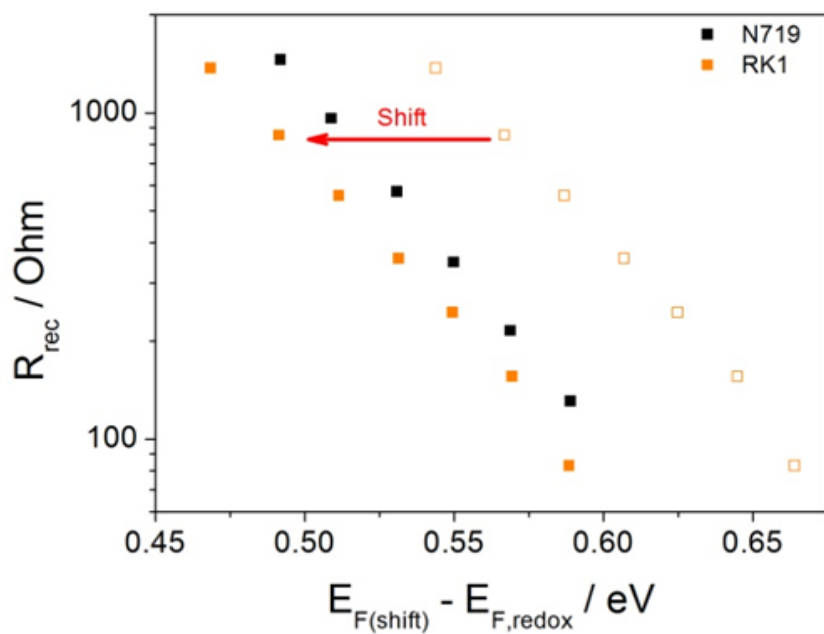

**Figure S7:** Electron recombination resistance data as extracted from EIS measurements for N719-DSSC and RK1-DSSC after (filled squares) and before (empty squares) applying a shift on the Fermi level (both sample show the same capacitance at the same electron density).

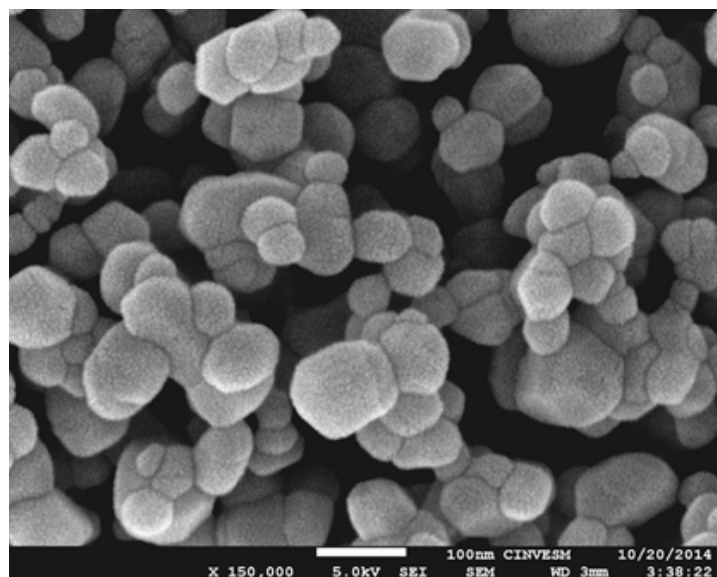

**Figure S8:** SEM picture of a sintered ZnO nanostructured film used as photoanode
